# Supplementary material for: Modeling of Bentazone Leaching in Soils with Low Organic Matter Content
Source: MDPI journal article supplement (doi:10.3390/ijerph19127187), 2022-06-11
Supplement: s1 [file s1]

*Supplementary Materials for:*

**Modelling of bentazone leaching in soils with low organic matter content**

Tadeusz Paszko<sup>1\*</sup>, Claudio Aparecido Spadotto<sup>2</sup>

<sup>1</sup>  
*Department of Chemistry, University of Life Sciences, Akademicka 13, 20-950 Lublin,  
Poland*

<sup>2</sup>*Embrapa Digital Agriculture, Av. André Tosello, 209, Campinas (SP) 13083-886, Brazil*

*\*Corresponding author. Tel. +48 81 445 6640*

*E-mail address: [tadeusz.paszko@up.lublin.pl](mailto:tadeusz.paszko@up.lublin.pl)*

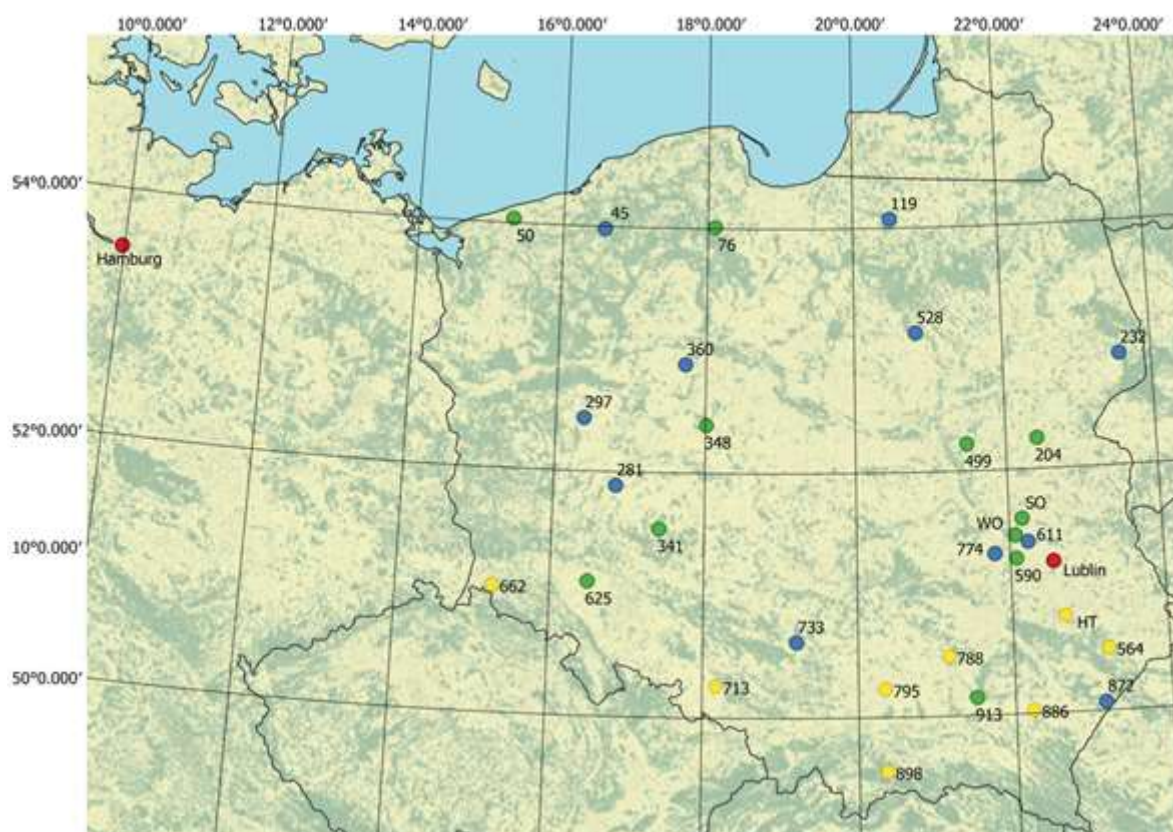

**Figure. S1.** Locations of the studied soil profiles (● Arenosols, ● Luvisols, ● Luvisols and Cambisols) on the map of Poland and sources of the examined climatic data (●).

**Table S1.** Basic physical and chemical properties and locations of soils from 30 profiles of AR, LV and LV&CM soil groups.

| Code           | Location                                   | Hor. | Depth (cm) | <i>Sand</i> <sup>a</sup><br>(%)<br>2000-50 | <i>Silt</i> <sup>a</sup><br>(%)<br>50-2 | <i>Clay</i> <sup>a</sup><br>(%)<br>< 2 | <i>OC</i> <sup>b</sup><br>(%) | pH (CaCl <sub>2</sub> ) | <i>FC</i> <sup>c</sup><br>(L/L) | <i>K<sub>s</sub></i> <sup>d</sup><br>(cm/day) |
|----------------|--------------------------------------------|------|------------|--------------------------------------------|-----------------------------------------|----------------------------------------|-------------------------------|-------------------------|---------------------------------|-----------------------------------------------|
| Arenosols (AR) |                                            |      |            |                                            |                                         |                                        |                               |                         |                                 |                                               |
| 45             | Gołdaw <sup>c</sup><br>(53°59'N, 16°34'E)  | Ap   | 10-15      | 82.2                                       | 15.4                                    | 2.4                                    | 1.13                          | 5.0                     | 0.240                           | 111.6                                         |
|                |                                            | BC   | 35-40      | 93.9                                       | 4.8                                     | 1.3                                    | 0.10                          | 5.8                     | 0.215                           | 419.2                                         |
|                |                                            | C    | 90-95      | 93.5                                       | 4.8                                     | 1.7                                    | 0.02                          | 6.0                     | 0.216                           | 299.7                                         |
| 119            | Wróblík <sup>c</sup><br>(54°04'N, 20°27'E) | Ap   | 20-25      | 90.2                                       | 7.0                                     | 2.8                                    | 1.42                          | 4.6                     | 0.225                           | 291.8                                         |
|                |                                            | Bw   | 60-65      | 96.5                                       | 1.9                                     | 1.6                                    | 0.33                          | 5.5                     | 0.210                           | 600.1                                         |
|                |                                            | C    | 100-105    | 97.5                                       | 1.0                                     | 1.5                                    | 0.06                          | 5.5                     | 0.208                           | 555.0                                         |
| 232            | Makówka <sup>c</sup><br>(52°54'N, 23°33'E) | Ap   | 10-20      | 92.7                                       | 5.4                                     | 1.9                                    | 0.88                          | 4.2                     | 0.218                           | 435.7                                         |
|                |                                            | Bw   | 35-45      | 98.1                                       | 1.1                                     | 0.8                                    | 0.35                          | 5.1                     | 0.205                           | 785.4                                         |
|                |                                            | C    | 90-100     | 98.7                                       | 0.4                                     | 0.9                                    | 0.00                          | 5.5                     | 0.204                           | 686.4                                         |
| 281            | Górzno <sup>c</sup><br>(51°53'N, 16°49'E)  | Ap   | 10-20      | 87.8                                       | 9.1                                     | 3.1                                    | 1.06                          | 3.9                     | 0.231                           | 207.1                                         |
|                |                                            | Bw   | 40-50      | 94.5                                       | 4.7                                     | 0.8                                    | 0.31                          | 4.8                     | 0.213                           | 470.7                                         |

|                      |                           |     |         |      |      |      |      |     |       |       |
|----------------------|---------------------------|-----|---------|------|------|------|------|-----|-------|-------|
|                      |                           | C   | 90-100  | 95.4 | 2.6  | 2.0  | 0.07 | 5.2 | 0.213 | 392.8 |
| 297                  | Śliwno <sup>c</sup>       | Ap  | 0-30    | 83.9 | 14.3 | 1.8  | 1.09 | 4.7 | 0.236 | 137.7 |
|                      | (52°26'N, 16°22'E)        | BC  | 30-50   | 88.2 | 9.6  | 2.2  | 0.10 | 5.6 | 0.228 | 174.1 |
|                      |                           | C   | 80-100  | 94.9 | 3.2  | 1.9  | 0.05 | 5.8 | 0.214 | 366.5 |
| 360                  | Dobrylewo <sup>c</sup>    | Ap  | 10-20   | 92.1 | 5.1  | 2.8  | 0.69 | 5.2 | 0.221 | 381.7 |
|                      | (52°53'N, 17°43'E)        | BC  | 40-50   | 96.9 | 1.6  | 1.5  | 0.08 | 6.4 | 0.209 | 638.6 |
|                      |                           | C   | 100-110 | 97.9 | 0.3  | 1.8  | 0.00 | 6.6 | 0.208 | 577.0 |
| 528                  | Marianowo <sup>c</sup>    | Ap  | 10-25   | 84.4 | 13.8 | 1.8  | 1.25 | 5.4 | 0.235 | 145.7 |
|                      | (53°08'N, 20°49'E)        | BC  | 40-60   | 94.1 | 3.8  | 2.1  | 0.09 | 4.8 | 0.216 | 412.3 |
|                      |                           | C   | 70-90   | 97.5 | 0.7  | 1.8  | 0.05 | 5.4 | 0.209 | 544.3 |
| 611                  | Olempin <sup>c</sup>      | Ap  | 5-10    | 87.5 | 10.1 | 2.4  | 0.68 | 4.1 | 0.230 | 206.4 |
|                      | (51°24'N, 22°14'E)        | BC  | 35-45   | 92.6 | 5.7  | 1.7  | 0.09 | 4.6 | 0.218 | 338.2 |
|                      |                           | C   | 65-75   | 96.1 | 2.4  | 1.5  | 0.03 | 4.3 | 0.211 | 450.8 |
| 733                  | Rosochacz <sup>c</sup>    | Ap  | 0-25    | 83.3 | 14.8 | 1.9  | 1.30 | 4.9 | 0.237 | 128.4 |
|                      | (50°37'N, 19°12'E)        | Bw  | 25-60   | 92.0 | 5.8  | 2.2  | 0.48 | 4.6 | 0.220 | 300.8 |
|                      |                           | C   | 60-150  | 94.3 | 3.8  | 1.9  | 0.06 | 4.5 | 0.215 | 334.5 |
| 774                  | Jedlińsk <sup>c</sup>     | Ap  | 10-20   | 89.3 | 8.7  | 2.0  | 1.11 | 4.4 | 0.225 | 268.3 |
|                      | (51°32'N, 21°08'E)        | Bw  | 40-50   | 95.1 | 3.9  | 1.0  | 0.30 | 5.1 | 0.212 | 508.0 |
|                      |                           | C   | 105-110 | 96.9 | 1.0  | 2.1  | 0.00 | 6.1 | 0.210 | 488.5 |
| 872                  | Łukawiec <sup>c</sup>     | Ap  | 10-20   | 92.1 | 6.1  | 1.8  | 0.80 | 4.2 | 0.219 | 402.2 |
|                      | (50°04'N, 23°08'E)        | Bw  | 60-70   | 96.3 | 2.0  | 1.7  | 0.17 | 4.7 | 0.211 | 580.0 |
|                      |                           | C   | 100-110 | 98.0 | 0.8  | 1.2  | 0.03 | 4.4 | 0.206 | 608.6 |
| <b>Luvisols (LV)</b> |                           |     |         |      |      |      |      |     |       |       |
| 50                   | Niemierze <sup>c</sup>    | Ap  | 5-10    | 71.5 | 21.8 | 6.7  | 1.23 | 5.2 | 0.270 | 37.1  |
|                      | (54°04'N, 15°31'E)        | E   | 30-35   | 71.2 | 21.5 | 7.3  | 0.35 | 4.5 | 0.272 | 35.3  |
|                      |                           | Bt  | 90-95   | 61.0 | 21.5 | 17.5 | 0.15 | 5.3 | 0.313 | 9.6   |
| 76                   | Wilcze Błota <sup>c</sup> | Ap  | 10-30   | 73.3 | 18.6 | 8.1  | 1.23 | 5.2 | 0.270 | 38.0  |
|                      | (54°01'N, 18°10'E)        | Bt1 | 40-60   | 55.4 | 22.9 | 21.7 | 0.18 | 4.6 | 0.333 | 8.8   |
|                      |                           | Bt2 | 80-100  | 59.3 | 18.6 | 22.1 | 0.11 | 4.5 | 0.326 | 7.2   |
| 204                  | Drohiczyn <sup>c</sup>    | Ap  | 5-15    | 71.6 | 20.9 | 7.5  | 1.69 | 6.1 | 0.271 | 35.7  |
|                      | (52°25'N, 22°41'E)        | E   | 30-40   | 76.4 | 17.9 | 5.7  | 0.36 | 6.3 | 0.259 | 53.0  |
|                      |                           | Bt  | 100-110 | 49.7 | 25.5 | 24.8 | 0.08 | 6.7 | 0.350 | 4.4   |
| 341                  | Fabianów <sup>c</sup>     | Ap  | 10-20   | 68.9 | 21.7 | 9.4  | 1.16 | 6.8 | 0.281 | 28.1  |
|                      | (51°53'N, 17°41'E)        | Bt1 | 40-45   | 67.7 | 18.1 | 14.2 | 0.26 | 6.5 | 0.293 | 20.6  |
|                      |                           | Bt2 | 100-110 | 56.4 | 21.9 | 21.7 | 0.13 | 6.0 | 0.331 | 6.6   |
| 348                  | Olsza <sup>c</sup>        | Ap  | 10-30   | 86.3 | 9.8  | 3.9  | 0.72 | 5.7 | 0.235 | 152.8 |
|                      | (52°39'N, 18°01'E)        | E   | 30-50   | 78.2 | 16.5 | 5.3  | 0.13 | 6.4 | 0.254 | 62.1  |
|                      |                           | Bt  | 80-100  | 60.2 | 21.3 | 18.5 | 0.09 | 6.3 | 0.317 | 8.9   |
| 499                  | Pniewnik <sup>c</sup>     | Ap  | 0-25    | 80.7 | 14.4 | 4.9  | 1.29 | 4.2 | 0.248 | 78.8  |
|                      | (52°22'N, 21°48'E)        | E   | 25-45   | 72.4 | 18.8 | 8.8  | 0.20 | 4.5 | 0.273 | 34.7  |

|                                          |                               |                  |         |      |      |      |      |     |       |      |
|------------------------------------------|-------------------------------|------------------|---------|------|------|------|------|-----|-------|------|
|                                          |                               | Bt               | 45-110  | 59.1 | 23.8 | 17.1 | 0.16 | 4.9 | 0.316 | 9.2  |
| 590                                      | Dęba <sup>c</sup>             | Ap               | 5-15    | 80.0 | 16.5 | 3.5  | 0.93 | 4.7 | 0.247 | 79.6 |
|                                          | (51°26'N, 22°10'E)            | E                | 35-45   | 79.8 | 15.3 | 4.9  | 0.12 | 5.0 | 0.250 | 72.6 |
|                                          |                               | Bt               | 65-75   | 60.0 | 20.6 | 19.4 | 0.08 | 4.9 | 0.319 | 8.4  |
| 625                                      | Krępice <sup>c</sup>          | Ap               | 10-20   | 69.1 | 22.6 | 8.3  | 1.17 | 5.3 | 0.278 | 30.1 |
|                                          | (51°10'N, 16°49'E)            | Bt               | 50-55   | 42.0 | 30.0 | 28.0 | 0.15 | 6.3 | 0.372 | 3.9  |
|                                          |                               | BC               | 110-115 | 49.8 | 27.6 | 22.6 | 0.07 | 5.0 | 0.346 | 4.9  |
| 913                                      | Werynia <sup>c</sup>          | Ap               | 5-20    | 72.0 | 20.9 | 7.1  | 0.91 | 4.4 | 0.270 | 37.2 |
|                                          | (50°15'N, 21°52'E)            | Bt               | 40-50   | 50.6 | 23.4 | 26.0 | 0.15 | 4.3 | 0.351 | 6.2  |
|                                          |                               | BC               | 80-90   | 56.6 | 23.9 | 19.5 | 0.06 | 5.1 | 0.326 | 7.4  |
| WO                                       | Wola Osińska <sup>f</sup>     | Ap               | 5-20    | 60.0 | 35.0 | 5.0  | 0.75 | 5.4 | 0.290 | 26.9 |
|                                          | (51°46'N, 22°10'E)            | Bt1              | 30-50   | 41.0 | 31.0 | 28.0 | 0.26 | 4.7 | 0.374 | 3.8  |
|                                          |                               | Bt2              | 70-80   | 24.0 | 30.0 | 46.0 | 0.12 | 4.4 | 0.444 | 2.3  |
| SO                                       | Sobieszyn <sup>f</sup>        | Ap               | 5-15    | 53.0 | 42.0 | 5.0  | 0.80 | 6.7 | 0.304 | 22.6 |
|                                          | (51°60'N, 22°17'E)            | Bt1              | 30-40   | 46.0 | 31.0 | 23.0 | 0.28 | 6.2 | 0.354 | 5.5  |
|                                          |                               | Bt2              | 55-60   | 39.0 | 32.0 | 29.0 | 0.10 | 6.4 | 0.380 | 2.5  |
| <b>Luvisols or Cambisols (LV&amp;CM)</b> |                               |                  |         |      |      |      |      |     |       |      |
| 564                                      | Skierbieszów <sup>c</sup>     | Ap               | 10-20   | 25.5 | 64.8 | 9.7  | 1.23 | 6.6 | 0.368 | 30.5 |
|                                          | (50°51'N, 23°22'E)            | Bw               | 35-50   | 18.5 | 71.7 | 9.8  | 0.53 | 6.3 | 0.383 | 23.0 |
|                                          |                               | BC               | 65-75   | 21.3 | 68.3 | 10.4 | 0.49 | 6.2 | 0.378 | 18.1 |
| 662                                      | Ubocze <sup>c</sup>           | Ap               | 15-25   | 16.0 | 80.4 | 3.6  | 1.80 | 7.2 | 0.375 | 51.4 |
|                                          | (51°04'N, 15°26'E)            | Bw               | 35-45   | 21.3 | 74.5 | 4.2  | 0.99 | 5.5 | 0.366 | 36.7 |
|                                          |                               | Bt               | 100-110 | 26.0 | 63.9 | 10.1 | 0.31 | 5.3 | 0.368 | 17.9 |
| 713                                      | Klucz <sup>c</sup>            | Ap               | 0-35    | 16.6 | 81.3 | 2.1  | 1.33 | 6.8 | 0.371 | 57.4 |
|                                          | (50°26'N, 18°17'E)            | Bt1              | 35-75   | 18.4 | 67.9 | 13.7 | 0.24 | 6.2 | 0.391 | 16.4 |
|                                          |                               | Bt2              | 75-150  | 14.9 | 69.2 | 15.9 | 0.13 | 5.1 | 0.402 | 11.8 |
| 788                                      | Łężyce <sup>c</sup>           | Ap               | 10-20   | 16.8 | 73.2 | 10.0 | 1.05 | 7.1 | 0.386 | 31.8 |
|                                          | (50°49'N, 21°20'E)            | Bw               | 25-35   | 21.5 | 67.3 | 11.2 | 0.56 | 7.3 | 0.379 | 19.8 |
|                                          |                               | BC <sub>ca</sub> | 110-120 | 16.3 | 77.4 | 6.3  | 0.46 | 7.6 | 0.380 | 26.2 |
| 795                                      | Złota <sup>c</sup>            | Ap               | 10-20   | 14.6 | 78.5 | 6.9  | 1.02 | 5.1 | 0.385 | 40.1 |
|                                          | (50°23'N, 20°34'E)            | Bw               | 30-40   | 22.0 | 69.1 | 8.9  | 0.27 | 6.4 | 0.374 | 24.3 |
|                                          |                               | BC <sub>ca</sub> | 110-120 | 19.6 | 73.8 | 6.6  | 0.47 | 7.7 | 0.374 | 25.5 |
| 886                                      | Studzian <sup>c</sup>         | Ap               | 5-15    | 15.1 | 74.6 | 10.3 | 1.27 | 5.2 | 0.390 | 31.1 |
|                                          | (50°03'N, 22°22'E)            | Bt               | 50-60   | 22.7 | 61.5 | 15.8 | 0.20 | 6.2 | 0.386 | 13.0 |
|                                          |                               | BC               | 110-120 | 22.6 | 68.1 | 9.3  | 0.12 | 6.6 | 0.373 | 19.8 |
| 898                                      | Uszwica Porębska <sup>c</sup> | Ap               | 15-25   | 13.0 | 80.7 | 6.3  | 1.39 | 5.1 | 0.387 | 41.3 |
|                                          | (49°56'N, 20°35'E)            | Bt               | 50-60   | 17.5 | 62.8 | 19.7 | 0.24 | 4.9 | 0.404 | 10.1 |
|                                          |                               | BC               | 90-100  | 14.5 | 71.5 | 14.0 | 0.13 | 5.1 | 0.399 | 13.9 |
| HT                                       | Huta Turobińska <sup>f</sup>  | Ap               | 5-15    | 15.0 | 80.0 | 5.0  | 0.76 | 6.1 | 0.380 | 46.2 |
|                                          | (50°80'N, 22°69'E)            | E                | 25-35   | 22.0 | 76.0 | 2.0  | 0.5  | 5.4 | 0.360 | 44.5 |

<sup>a</sup> soil texture - determined using the pipette method (ISO 11277, 2009); <sup>b</sup> organic carbon content - determined using a Shimadzu TOC-VCSH analyser and a SSM-5000A solid sample module; <sup>c</sup> water content at field capacity - estimated using pedotransfer functions of PELMO (Klein, 2018); <sup>d</sup> saturated hydraulic conductivity - estimated using Rosetta Version 1.2; <sup>e</sup> profiles selected and soil samples obtained from the database and soil collection of the Institute of Agrophysics of the Polish Academy of Science in Lublin (Bieganowski et al., 2013); <sup>f</sup> profiles selected based on recommendations from the Institute of Soil Sciences and Environment Shaping of the University of Life Sciences in Lublin.

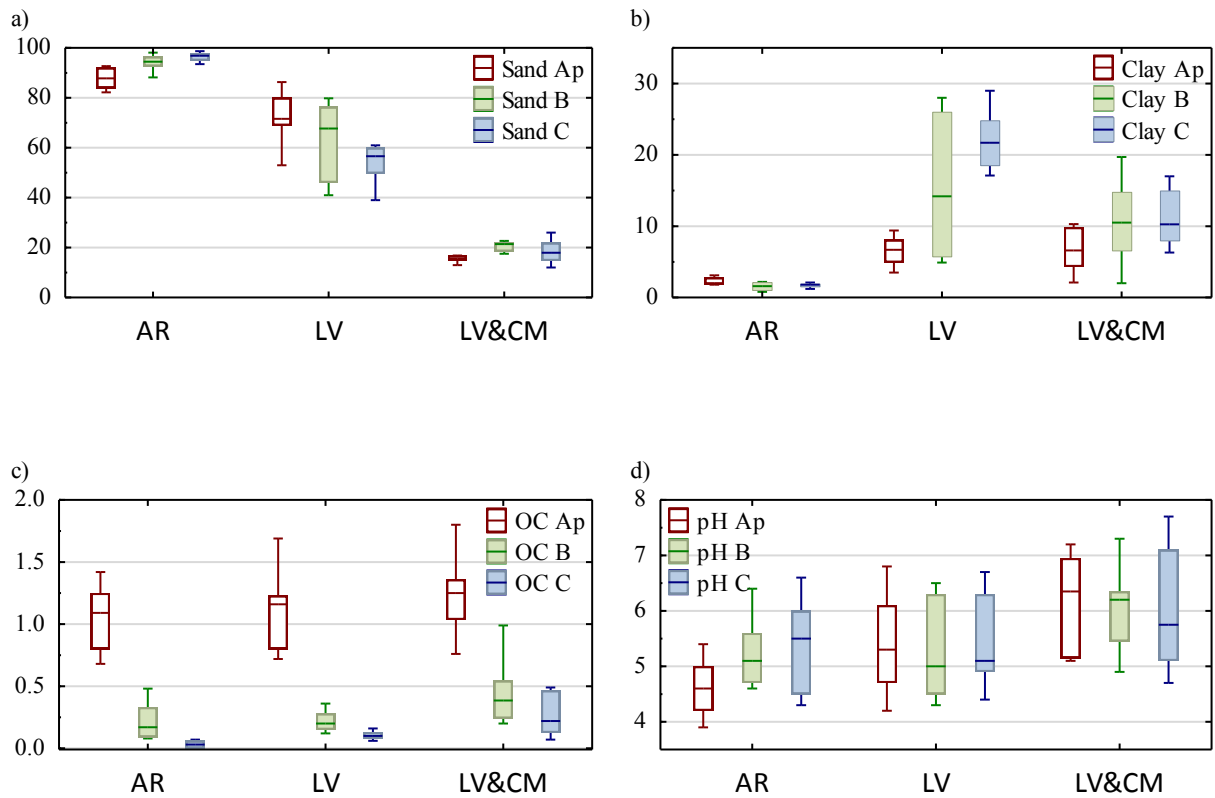

**Figure. S2.** Box and whiskers plots (minimum, Q1, median, Q3 and maximum) of *Sand*, *Clay*, *OC*, and *pH* in AR, LV and LV&CM soil groups.

The used form of the Freundlich model that was fitted to data from adsorption experiments was:

$$S_{ads} = K_F \cdot C_{aq}(eq)^{1/n} \quad (S1)$$

where  $S_{ads}$  ( $\mu\text{g/g}$ ) and  $C_{aq}(eq)$  ( $\mu\text{g/mL}$ ) are concentrations of the test substance at adsorption equilibrium in the solid and liquid phase, respectively,  $K_F$  ( $\mu\text{g}^{1-1/n} (\text{mL})^{1/n} \text{g}^{-1}$ ) is the Freundlich adsorption coefficient, and  $1/n$  is the Freundlich exponent. Results are visualized in Fig. S3 and the obtained Freundlich coefficients are listed in Table S2. Adsorption isotherms were determined in the HT, WO and SO profiles of LV used previously for degradation experiments (Paszko and Muszyński, 2017), and additionally in the 611, 590 and 564 profiles representing the typical AR, LV, and LV&CM profiles (Table S1).

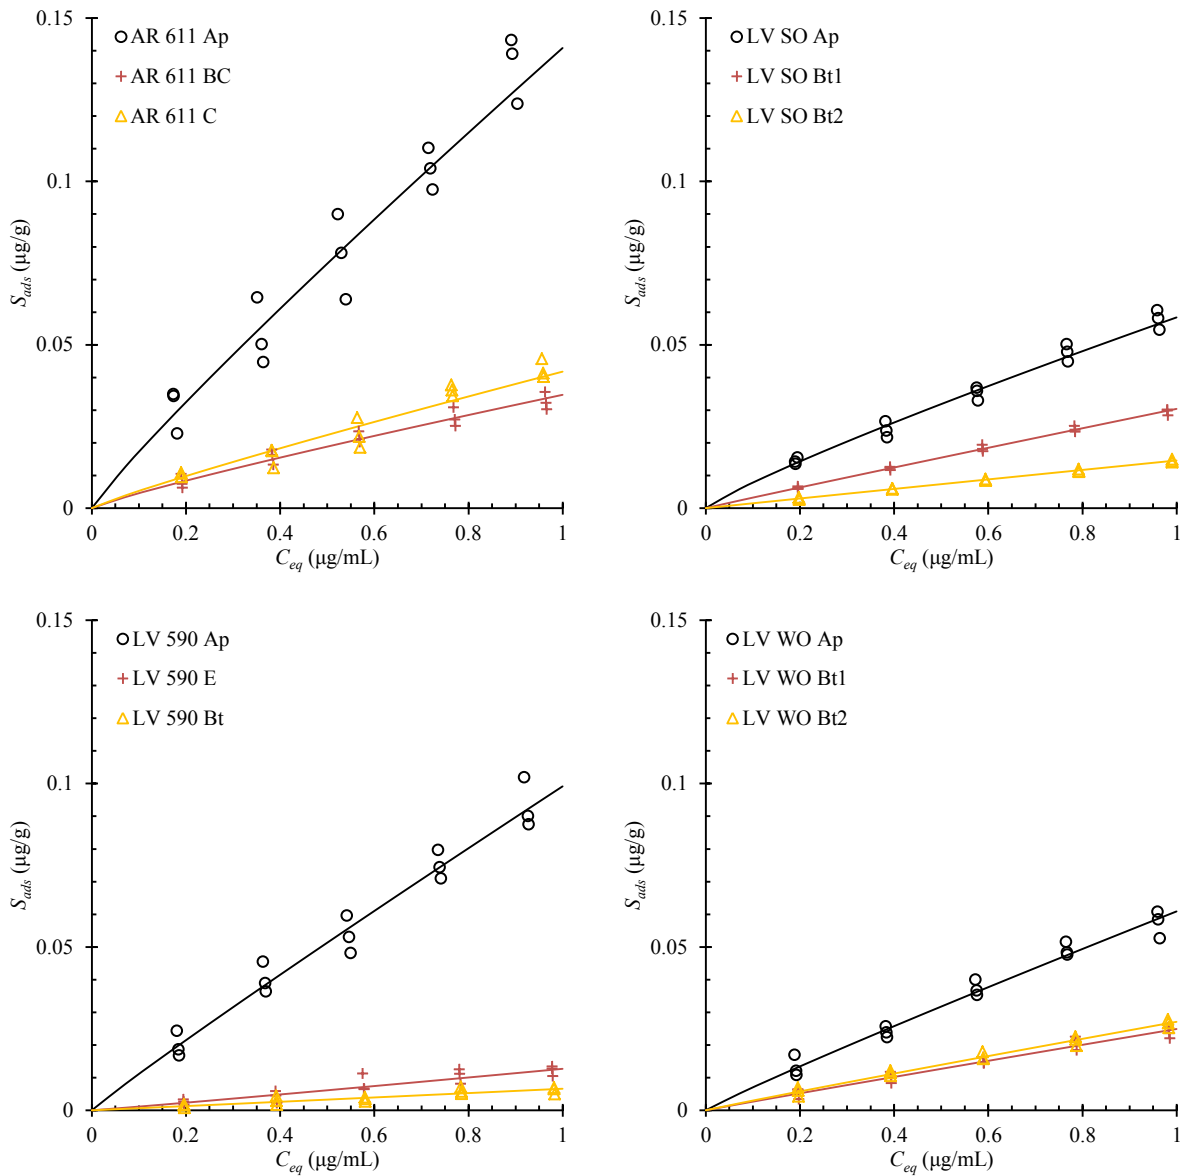

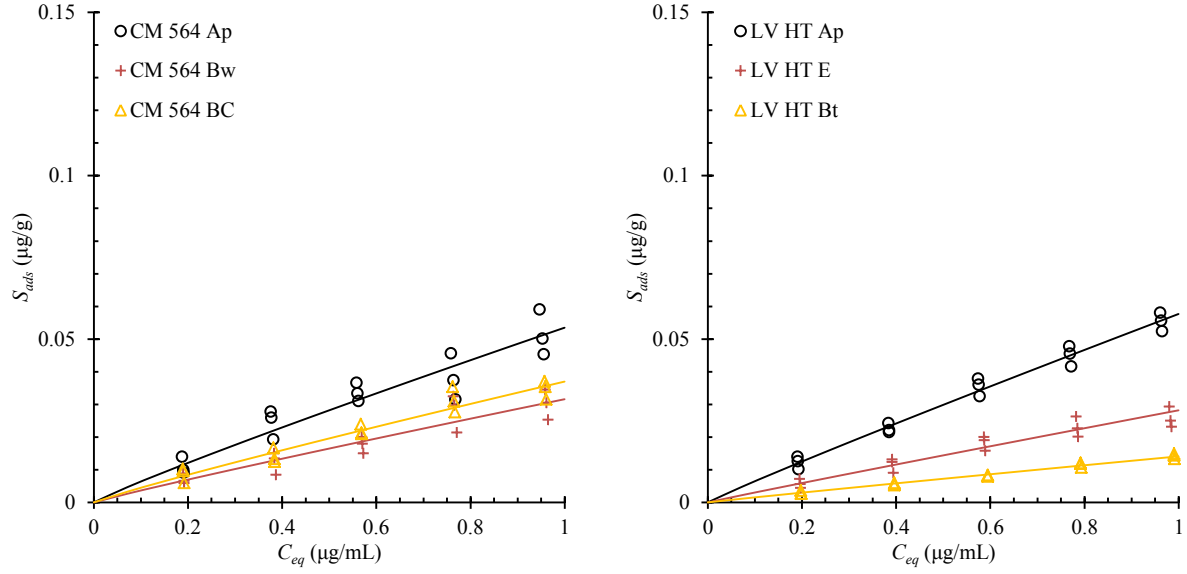

**Figure. S3.** Adsorption isotherms of bentazone in the six selected profiles of mineral soils.

Lines represent results of fitting of the Freundlich equation (for details see Table S2).

**Table S2.** Results of fitting of the Freundlich equation to data from the batch adsorption experiments presented in Fig. S3.

| Soil      | $K_F$<br>( $\mu\text{g}^{1-1/n}(\text{mL})^{1/n} \text{g}^{-1}$ ) | $1/n$ | $R^2$ | $K_{FOC}$<br>( $\mu\text{g}^{1-1/n}(\text{mL})^{1/n} \text{g}^{-1}$ ) |
|-----------|-------------------------------------------------------------------|-------|-------|-----------------------------------------------------------------------|
| AR 611 Ap | 0.141                                                             | 0.91  | 0.942 | 20.7                                                                  |
| AR 611 BC | 0.035                                                             | 0.88  | 0.923 | 38.9                                                                  |
| AR 611 C  | 0.042                                                             | 0.90  | 0.940 | 140.0                                                                 |
| LV SO Ap  | 0.058                                                             | 0.87  | 0.982 | 7.3                                                                   |
| LV SO Bt1 | 0.032                                                             | 0.97  | 0.995 | 11.4                                                                  |
| LV SO Bt2 | 0.015                                                             | 0.99  | 0.993 | 15.0                                                                  |
| LV 590 Ap | 0.099                                                             | 0.95  | 0.963 | 10.6                                                                  |
| LV 590 E  | 0.013                                                             | 1.05  | 0.821 | 10.8                                                                  |
| LV 590 Bt | 0.007                                                             | 1.01  | 0.787 | 8.8                                                                   |
| LV WO Ap  | 0.061                                                             | 0.94  | 0.963 | 8.1                                                                   |
| LV WO Bt1 | 0.025                                                             | 0.97  | 0.921 | 9.6                                                                   |
| LV WO Bt2 | 0.027                                                             | 0.96  | 0.965 | 22.5                                                                  |
| CM 564 Ap | 0.054                                                             | 0.92  | 0.870 | 4.4                                                                   |

|           |       |      |       |      |
|-----------|-------|------|-------|------|
| CM 564 Bw | 0.032 | 0.94 | 0.886 | 6.0  |
| CM 564 BC | 0.037 | 0.92 | 0.925 | 7.6  |
| LV HT Ap  | 0.058 | 0.95 | 0.977 | 7.6  |
| LV HT E   | 0.028 | 0.97 | 0.930 | 5.6  |
| LV HT Bt  | 0.014 | 0.96 | 0.981 | 20.0 |

**Table S3.** Soil properties for Hamburg scenario (FOCUS, 2000).

| Horizon | Depth<br>(cm) | pH-<br>H <sub>2</sub> O | pH-<br>KCl | Texture (mm) |            |       | OC<br>(%) | Bulk<br>Density<br>(g cm <sup>-3</sup> ) | DDF |
|---------|---------------|-------------------------|------------|--------------|------------|-------|-----------|------------------------------------------|-----|
|         |               |                         |            | <0.002       | 0.002-0.05 | >0.05 |           |                                          |     |
| Ap      | 0-30          | 6.4                     | 5.7        | 7.2          | 24.5       | 68.3  | 1.5       | 1.5                                      | 1   |
| BvI     | 30-60         | 5.6                     | 4.9        | 6.7          | 26.3       | 67    | 1         | 1.6                                      | 0.5 |
| BvII    | 60-75         | 5.6                     | 4.9        | 0.9          | 2.9        | 96.2  | 0.2       | 1.56                                     | 0.3 |
| Bv/Cv   | 75-90         | 5.7                     | 5.0        | 0            | 0.2        | 99.8  | 0         | 1.62                                     | 0.3 |
| Cv      | 90-100        | 5.5                     | 4.8        | 0            | 0          | 100   | 0         | 1.6                                      | 0.3 |
| Cv      | 100-200       | 5.5                     | 4.8        | 0            | 0          | 100   | 0         | 1.6                                      | 0   |

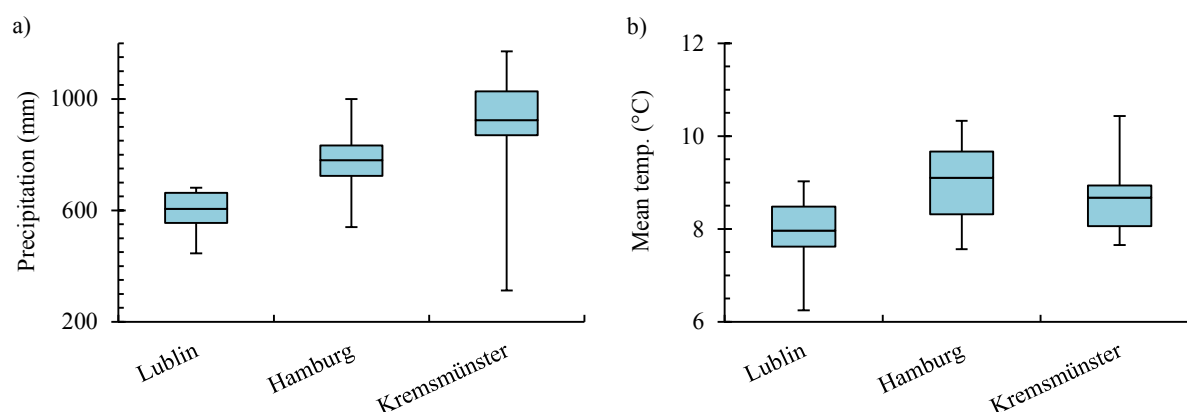

**Figure. S4.** Comparison of the mean annual precipitation and temperature of the FOCUS Hamburg and Kremsmünster climates with the Lublin climate, representing typical climate of Poland (FOCUS, 2000).



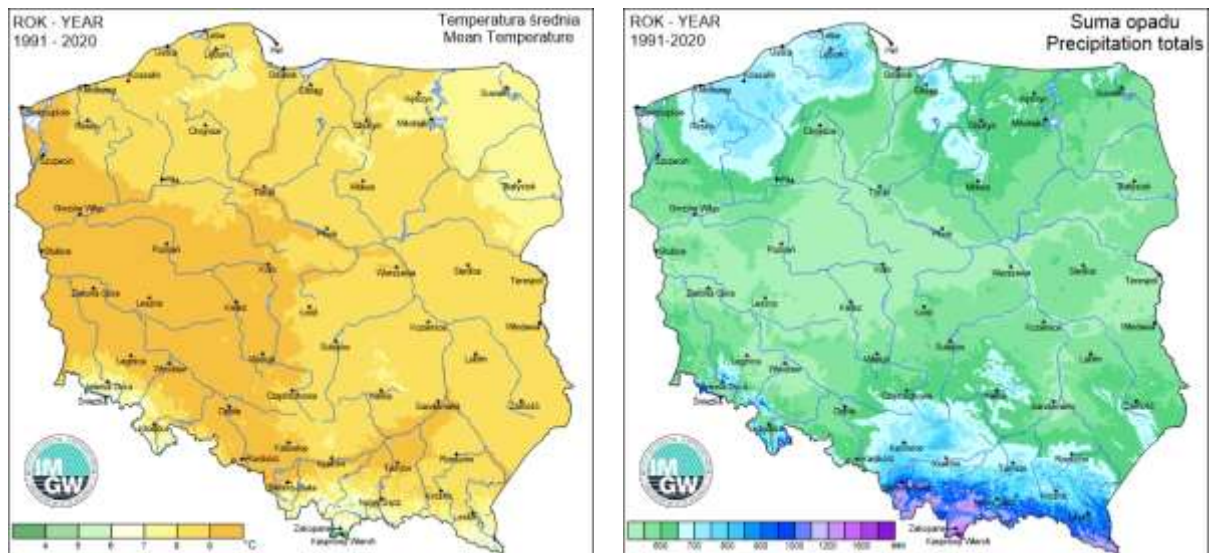

**Figure. S5.** Mean annual temperature and precipitation in Poland (1991-2020) according to the Institute of Meteorology and Water Management. Data from: <https://klimat.imgw.pl/pl/climate-maps/#Precipitation/Yearly/1991-2020/1/Winter> (accessed on 10 January 2022)

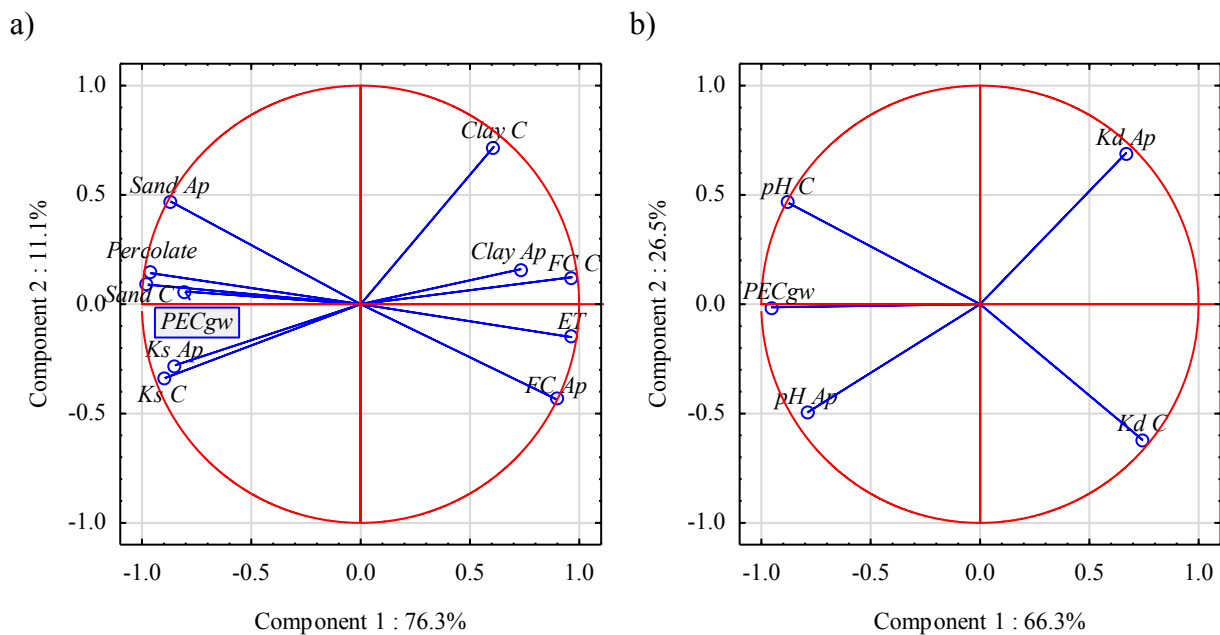

**Figure. S6.** PCA results: (a) The effect of soil properties on  $PEC_{gw}$  in AR, LV, and LV&CM soil groups in simulations of maize cultivation; (b) The effect of soil properties on  $PEC_{gw}$  in the AR soil group in simulations of maize cultivation.

**Table S4.** Values of  $p$  for Levene's tests, ANOVA F and post hoc LSD tests, or Kruskal-Wallis H and post hoc Dunn's tests for the selected soil properties.

| Variable                     | Levene's | ANOVA  | Kruskal-Wallis | Post hoc LSD or Dunn's tests |        |        |
|------------------------------|----------|--------|----------------|------------------------------|--------|--------|
|                              | test     | F test | H test         | AR                           | LV     | LV&CM  |
| $K_d$ Ap                     | 0.191    | 0.009  |                | AR                           | 0.020  | 0.004  |
|                              |          |        |                | LV                           | 0.020  | 0.404  |
|                              |          |        |                | LV&CM                        | 0.004  | 0.404  |
| $K_d$ B                      | 0.423    | 0.397  |                |                              |        |        |
| $K_d$ C                      | 0.007    |        | 0.433          |                              |        |        |
| <i>Percolate</i><br>(potato) | 0.003    |        | <0.001         | AR                           | 0.010  | <0.001 |
|                              |          |        |                | LV                           | 0.010  | 0.061  |
|                              |          |        |                | LV&CM                        | <0.001 | 0.061  |
| <i>Percolate</i><br>(maize)  | 0.016    |        | <0.001         | AR                           | 0.010  | <0.001 |
|                              |          |        |                | LV                           | 0.010  | 0.061  |
|                              |          |        |                | LV&CM                        | <0.001 | 0.061  |
| <i>ET</i><br>(potato)        | 0.003    |        | <0.001         | AR                           | 0.010  | <0.001 |
|                              |          |        |                | LV                           | 0.010  | 0.061  |
|                              |          |        |                | LV&CM                        | <0.001 | 0.061  |
| <i>ET</i><br>(maize)         | 0.017    |        | <0.001         | AR                           | 0.010  | <0.001 |
|                              |          |        |                | LV                           | 0.010  | 0.061  |
|                              |          |        |                | LV&CM                        | <0.001 | 0.061  |
| <i>FC</i> Ap                 | 0.073    |        | <0.001         | AR                           | 0.016  | <0.001 |
|                              |          |        |                | LV                           | 0.016  | 0.051  |
|                              |          |        |                | LV&CM                        | <0.001 | 0.051  |
| <i>FC</i> B                  | <0.001   |        | <0.001         | AR                           | 0.007  | <0.001 |
|                              |          |        |                | LV                           | 0.007  | 0.119  |
|                              |          |        |                | LV&CM                        | <0.001 | 0.119  |
| <i>FC</i> C                  | 0.007    |        | <0.001         | AR                           | 0.004  | <0.001 |
|                              |          |        |                | LV                           | 0.004  | 0.289  |
|                              |          |        |                | LV&CM                        | <0.001 | 0.289  |
| $K_s$ Ap                     | 0.254    |        | <0.001         | AR                           | <0.001 | 0.003  |
|                              |          |        |                | LV                           | <0.001 | 1.000  |
|                              |          |        |                | LV&CM                        | 0.003  | 1.000  |

|                                   |        |        |       |        |       |
|-----------------------------------|--------|--------|-------|--------|-------|
| <i>K<sub>s</sub> B</i>            | <0.001 | <0.001 | AR    | <0.001 | 0.001 |
|                                   |        |        | LV    | <0.001 | 1.000 |
|                                   |        |        | LV&CM | 0.001  | 1.000 |
| <i>K<sub>s</sub> C</i>            | <0.001 | <0.001 | AR    | <0.001 | 0.061 |
|                                   |        |        | LV    | <0.001 | 0.061 |
|                                   |        |        | LV&CM | 0.061  | 0.061 |
| <i>Volatilisation</i><br>(potato) | 0.254  | 0.043  | AR    | 0.032  | 0.030 |
|                                   |        |        | LV    | 0.032  | 0.827 |
|                                   |        |        | LV&CM | 0.030  | 0.827 |
| <i>Volatilisation</i><br>(maize)  | 0.276  | 0.041  | AR    | 0.033  | 0.027 |
|                                   |        |        | LV    | 0.033  | 0.784 |
|                                   |        |        | LV&CM | 0.027  | 0.784 |

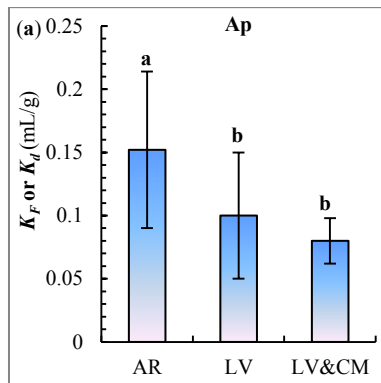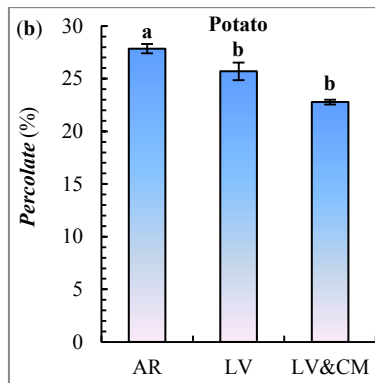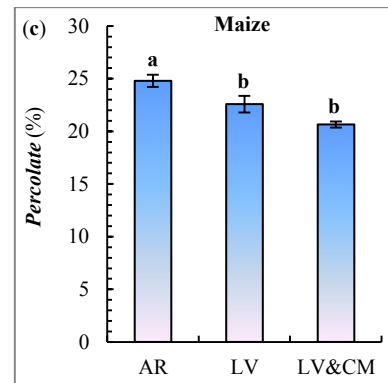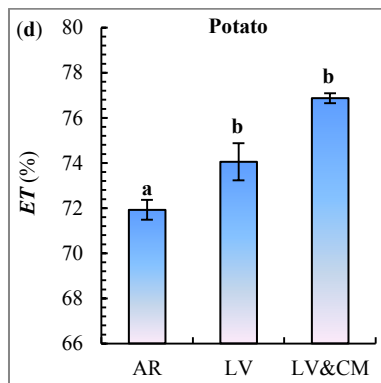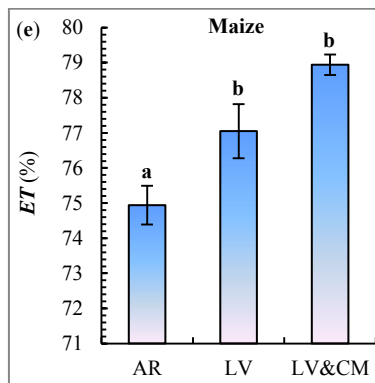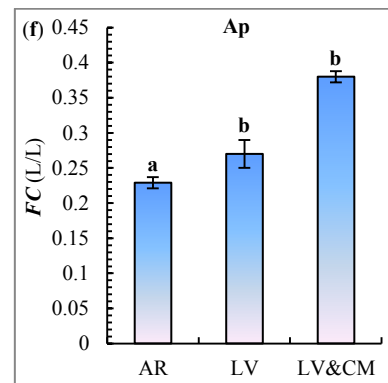

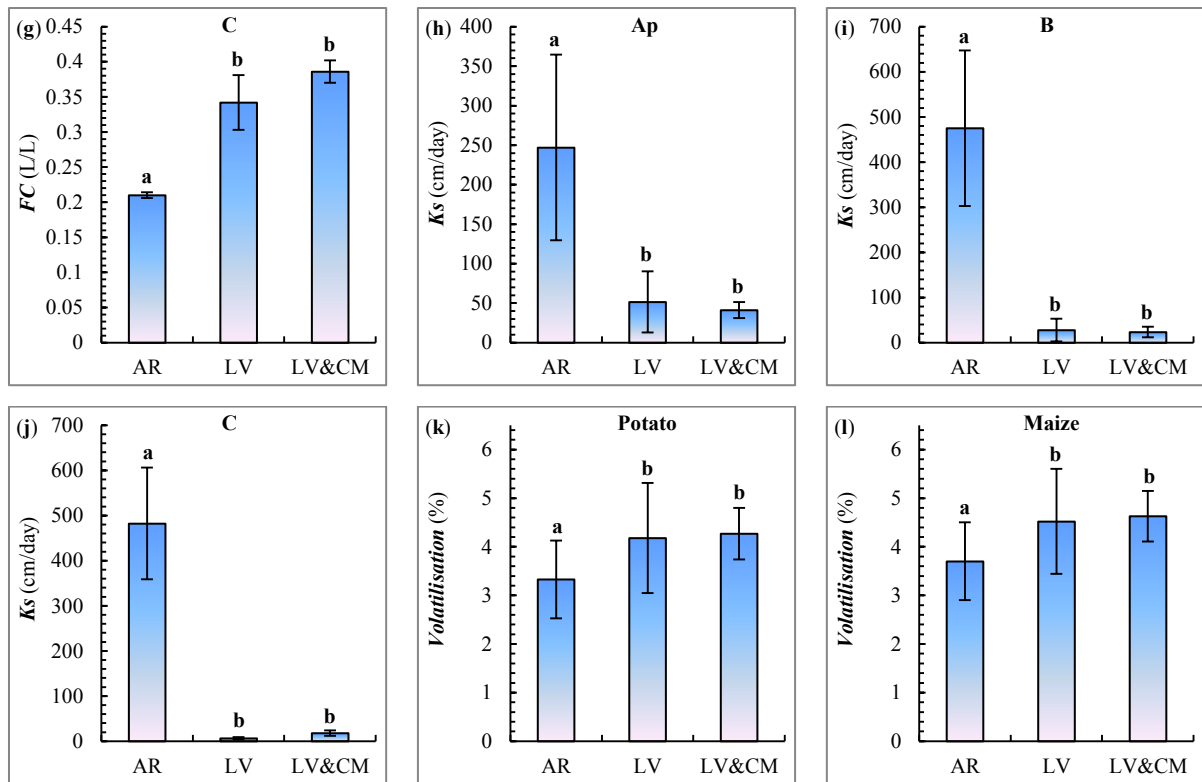

**Figure. S7.** Comparison of means, standard deviations (error bars), and results of ANOVA analyses (different letters above error bars denote significant differences ( $p < 0.05$ ); for details see Table S4) for the selected soil properties.

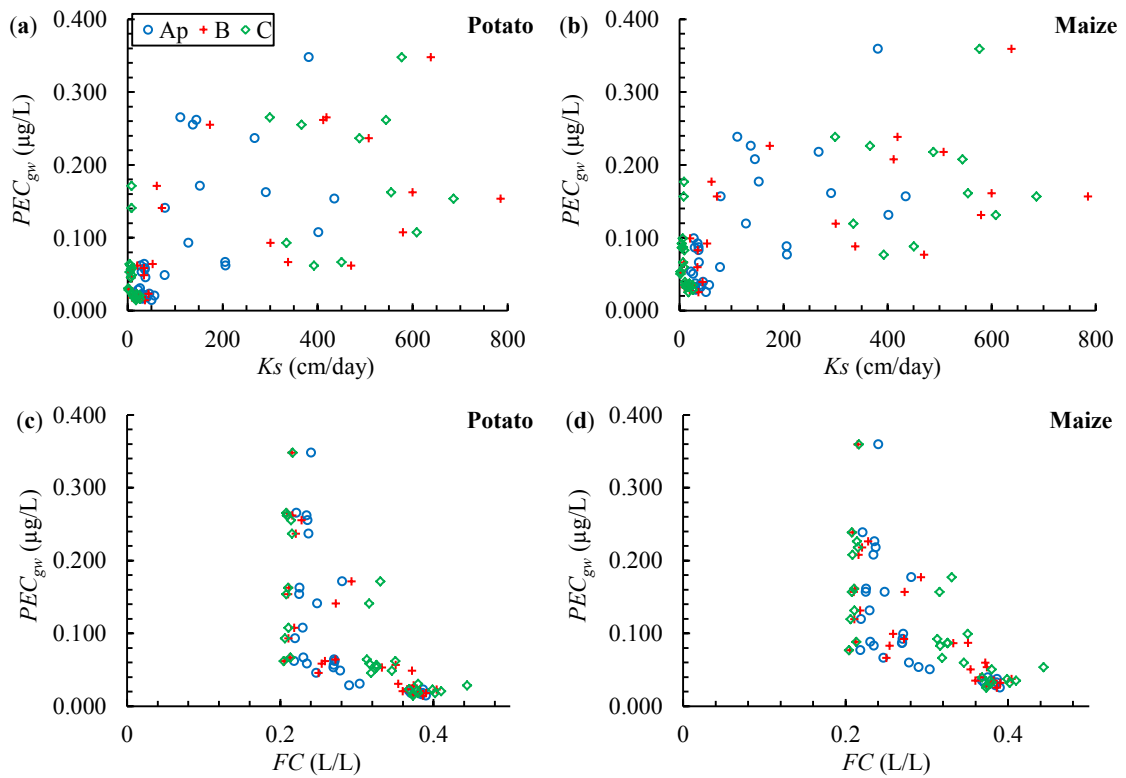

**Figure. S8.** Relationships between  $PEC_{gw}$  and  $K_s$ , and between  $PEC_{gw}$  and  $FC$  for potato and maize cultivation in the examined soils.

High variance of data in Figure S8a and S8b suggests that this rather nonlinear relationship is weak. However, the Spearman's correlation coefficients between  $PEC_{gw}$  and  $K_s$  Ap,  $K_s$  B, and  $K_s$  C were significant: 0.673 ( $p<0.001$ ), 0.741( $p<0.001$ ), and 0.449 ( $p=0.013$ ) for potato, and 0.616 ( $p<0.001$ ), 0.684 ( $p<0.001$ ), and 0.389 ( $p=0.034$ ) for maize cultivation. It is interesting that also the nonlinear relationship between  $PEC_{gw}$  and  $FC$  Ap,  $FC$  B, and  $FC$  C presented in Figure S8 was significant: -0.792 ( $p<0.001$ ), -0.823 ( $p<0.001$ ), and -0.805 ( $p<0.001$ ) for potato, and -0.750 ( $p<0.001$ ), -0.783 ( $p<0.001$ ), and -0.757 ( $p<0.001$ ) for maize cultivation.

**Table S5.** Percentiles of OC contents in the AR and LV soil groups according to the database and soil collection of the Institute of Agrophysics of the Polish Academy of Sciences in Lublin (Bieganski et al., 2013).

| Percentile<br>(n) | Arenosols   |            |           | Luvisols    |           |            |
|-------------------|-------------|------------|-----------|-------------|-----------|------------|
|                   | Ap<br>(255) | Bw<br>(58) | C<br>(51) | Ap<br>(150) | E<br>(23) | Bt<br>(13) |
| 99 <sup>th</sup>  | 3.61        | 1.72       | 0.67      | 2.88        | 0.78      | 0.16       |
| 95 <sup>th</sup>  | 2.23        | 1.09       | 0.20      | 1.26        | 0.65      | 0.15       |
| 90 <sup>th</sup>  | 1.52        | 0.68       | 0.14      | 1.16        | 0.57      | 0.15       |
| 85 <sup>th</sup>  | 1.30        | 0.51       | 0.11      | 1.07        | 0.44      | 0.13       |
| 80 <sup>th</sup>  | 1.14        | 0.36       | 0.11      | 0.95        | 0.39      | 0.13       |
| 75 <sup>th</sup>  | 1.05        | 0.32       | 0.08      | 0.91        | 0.37      | 0.12       |
| 70 <sup>th</sup>  | 0.95        | 0.30       | 0.08      | 0.85        | 0.36      | 0.12       |
| 65 <sup>th</sup>  | 0.92        | 0.23       | 0.07      | 0.82        | 0.35      | 0.12       |
| 60 <sup>th</sup>  | 0.87        | 0.21       | 0.07      | 0.80        | 0.33      | 0.11       |
| 55 <sup>th</sup>  | 0.82        | 0.20       | 0.07      | 0.75        | 0.29      | 0.11       |
| 50 <sup>th</sup>  | 0.78        | 0.18       | 0.06      | 0.75        | 0.28      | 0.10       |
| 45 <sup>th</sup>  | 0.75        | 0.17       | 0.06      | 0.73        | 0.26      | 0.09       |
| 40 <sup>th</sup>  | 0.68        | 0.16       | 0.06      | 0.71        | 0.26      | 0.09       |
| 35 <sup>th</sup>  | 0.65        | 0.14       | 0.05      | 0.67        | 0.24      | 0.08       |
| 30 <sup>th</sup>  | 0.61        | 0.12       | 0.05      | 0.65        | 0.20      | 0.08       |

|                  |      |      |      |      |      |      |
|------------------|------|------|------|------|------|------|
| 25 <sup>th</sup> | 0.58 | 0.11 | 0.04 | 0.61 | 0.19 | 0.08 |
| 20 <sup>th</sup> | 0.54 | 0.10 | 0.04 | 0.58 | 0.16 | 0.07 |
| 15 <sup>th</sup> | 0.48 | 0.09 | 0.03 | 0.52 | 0.15 | 0.07 |
| 10 <sup>th</sup> | 0.44 | 0.08 | 0.02 | 0.46 | 0.13 | 0.06 |
| 5 <sup>th</sup>  | 0.37 | 0.05 | 0.01 | 0.40 | 0.12 | 0.05 |
| 1 <sup>st</sup>  | 0.32 | 0.04 | 0    | 0.32 | 0.07 | 0.04 |

---

## References

- Bieganowski, A., et al., 2013. Database of Polish arable mineral soils: a review. *Int. Agrophys.* 27, 335-350.
- FOCUS, FOCUS groundwater scenarios in the EU review of active substances. Report of the FOCUS groundwater scenarios workgroup. Vol. EC Document Reference Sanco/321/2000 rev.2, 202 pp, 2000.
- ISO 11277, Soil quality - Determination of particle size distribution in mineral soil material - Method by sieving and sedimentation., 2009.
- Klein, M., PELMO (Pesticide Leaching Model)). Version 5.00. User Manual. Fraunhofer Institut for Molecular Biology and Applied Ecology, D-57392 Schmallenberg, Germany. 2018, pp. 30.
- Paszko, T., Muszyński, P., 2017. Degradation rates of alachlor, atrazine and bentazone in the profiles of Polish Luvisols. *Int. Agrophys.* 31, 401-410.
